# Supplementary material
Source: publisher figshare collection journal article supplement (https://tandf.figshare.com/articles/dataset/_/5354122)
Supplement: Supplementary file 2 [file 1]

**Appendix 1** - List of samples analysed in this study with locality, year of sampling, origin and haplotype designation for the mtDNA markers.

|            | COI haplotype    | ND2 haplotype    | Dloop haplotype    | Concatenated haplotype | Date       | Species                | Country      | Region        | Locality                       | Source                             | Cod     | Catalog N.  |
|------------|------------------|------------------|--------------------|------------------------|------------|------------------------|--------------|---------------|--------------------------------|------------------------------------|---------|-------------|
| <b>R1</b>  | Hap_COI_1        | Hap_ND2_1        | Hap_dloop_1        | Hap_1                  | 2000       | <i>Apus apus</i>       | Italy        | Piemonte      | Torino (TO), centro città      | Carmagnola Natural History Museum  | 25734   | MCCI 3527   |
| <b>R11</b> | Hap_COI_3        | Hap_ND2_5        | Hap_dloop_11       | Hap_11                 | 29/07/2013 | <i>Apus pallidus</i>   | Italy        | Piemonte      | Carmagnola (TO), Via Lomellini | Carmagnola Natural History Museum  | 26526   | MCCI 3889   |
| <b>R12</b> | Hap_COI_4        | Hap_ND2_6        | Hap_dloop_8        | Hap_8                  | 29/09/2013 | <i>Apus pallidus</i>   | Italy        | Piemonte      | Carmagnola (TO)                | Carmagnola Natural History Museum  | 26551   | MCCI 3913   |
| <b>R14</b> | Hap_COI_5        | Hap_ND2_5        | Hap_dloop_9        | Hap_9                  | 08/01/2011 | <i>Apus pallidus</i>   | Italy        | Piemonte      | Carmagnola (TO)                | Carmagnola Natural History Museum  | 25733   | MCCI 3526   |
| <b>R16</b> | Hap_COI_3        | Hap_ND2_7        | Hap_dloop_10       | Hap_10                 | 30/09/2014 | <i>Apus pallidus</i>   | Italy        | Piemonte      | Carmagnola (TO)                | Carmagnola Natural History Museum  |         | MCCI 4165   |
| <b>R17</b> | Hap_COI_3        | Hap_ND2_5        | Hap_dloop_11       | Hap_11                 | 18/08/2010 | <i>Apus pallidus</i>   | Italy        | Piemonte      | Carmagnola (TO)                | Carmagnola Natural History Museum  | 23065   | MCCI 3134   |
| <b>R19</b> | A. affinis_COI_1 | A. affinis_ND2_1 | A. affinis_dloop_1 | A. affinis_1           | 18/02/2010 | <i>Apus affinis</i>    | Bukina Faso  | Cascades      | Banfora                        | Carmagnola Natural History Museum  | 23468   | MCCI 3214   |
| <b>R2</b>  | Hap_COI_2        | Hap_ND2_2        | Hap_dloop_2        | Hap_2                  | 26/04/2003 | <i>Apus apus</i>       | Italy        | Liguria       | La Spezia (SP)                 | Carmagnola Natural History Museum  | 2259    | MCCI 1380   |
| <b>R20</b> | A. affinis_COI_1 | A. affinis_ND2_1 | A. affinis_dloop_2 | A. affinis_2           | 18/02/2010 | <i>Apus affinis</i>    | Bukina Faso  | Cascades      | Banfora                        | Carmagnola Natural History Museum  | 23466   | MCCI 3212   |
| <b>R22</b> | Hap_COI_3        | Hap_ND2_7        | Hap_dloop_10       | Hap_10                 | 2013       | <i>Apus pallidus</i>   | Italy        | Basilicata    | Prov. Matera (MT)              | Carmagnola Natural History Museum  | GB15-03 | MCCI 4211   |
| <b>R23</b> | Hap_COI_1        | Hap_ND2_3        | Hap_dloop_6        | Hap_6                  | 2014       | <i>Apus apus</i>       | Italy        | Puglia        | Prov. Lecce (LE)               | Carmagnola Natural History Museum  | GB15-04 | MCCI 4212   |
| <b>R25</b> | Hap_COI_3        | Hap_ND2_8        | Hap_dloop_11       | Hap_12                 | 14/07/2015 | <i>Apus pallidus</i>   | Italy        | Piemonte      | Carmagnola (TO)                | Gary Voelker, Texas A&M University |         | JAH091_AC01 |
| <b>R28</b> | Hap_COI_3        | Hap_ND2_9        | Hap_dloop_11       | Hap_13                 | 13/07/2015 | <i>Apus pallidus</i>   | Italy        | Piemonte      | Carmagnola (TO)                | Gary Voelker, Texas A&M University |         | JAH079_AC01 |
| <b>R29</b> | Hap_COI_3        | Hap_ND2_5        | Hap_dloop_11       | Hap_11                 | 13/07/2015 | <i>Apus pallidus</i>   | Italy        | Piemonte      | Carmagnola (TO)                | Gary Voelker, Texas A&M University |         | JAH076_AC01 |
| <b>R3</b>  | Hap_COI_1        | Hap_ND2_3        | Hap_dloop_3        | Hap_3                  | 05/05/2007 | <i>Apus apus</i>       | Italy        | Piemonte      | Torino (TO), Piazza Statuto    | Carmagnola Natural History Museum  | 10907   | MCCI 2635   |
| <b>R32</b> | A. bradfieldi_1  | A. bradfieldi_1  | A. bradfieldi_1    | A. bradfieldi_1        | 23/09/2009 | <i>Apus bradfieldi</i> | South Africa | Northern Cape | Kimberley                      | Gary Voelker, Texas A&M University | V3363   | TCWC 15572  |
| <b>R4</b>  | Hap_COI_1        | Hap_ND2_1        | Hap_dloop_1        | Hap_1                  | 20/06/2014 | <i>Apus apus</i>       | Italy        | Piemonte      | Carmagnola (TO), Via Gardezza  | Carmagnola Natural History Museum  | 27109   | MCCI 4134   |
| <b>R6</b>  | Hap_COI_1        | Hap_ND2_4        | Hap_dloop_4        | Hap_4                  | Ante 2002  | <i>Apus apus</i>       | Italy        | Piemonte      | Undetermined                   | Carmagnola Natural History Museum  | 1137    | MCCI 998    |
| <b>R7</b>  | Hap_COI_2        | Hap_ND2_2        | Hap_dloop_5        | Hap_5                  | 23/04/2004 | <i>Apus apus</i>       | Italy        | Piemonte      | Asti (AT) Torre Trojana        | Carmagnola Natural History Museum  | 10859   | MCCI 2586   |
| <b>R8</b>  | Hap_COI_3        | Hap_ND2_5        | Hap_dloop_11       | Hap_11                 | 16/06/2014 | <i>Apus pallidus</i>   | Italy        | Piemonte      | Carmagnola (TO), Via Lomellini | Carmagnola Natural History Museum  | 27098   | MCCI 4124   |
| <b>R9</b>  | Hap_COI_3        | Hap_ND2_5        | Hap_dloop_7        | Hap_7                  | 17/09/2013 | <i>Apus pallidus</i>   | Italy        | Piemonte      | Carmagnola (TO)                | Carmagnola Natural History Museum  | 26548   | MCCI 3910   |
