# Supplementary material
Source: publisher figshare collection journal article supplement (https://tandf.figshare.com/articles/dataset/_/5354122)

COI

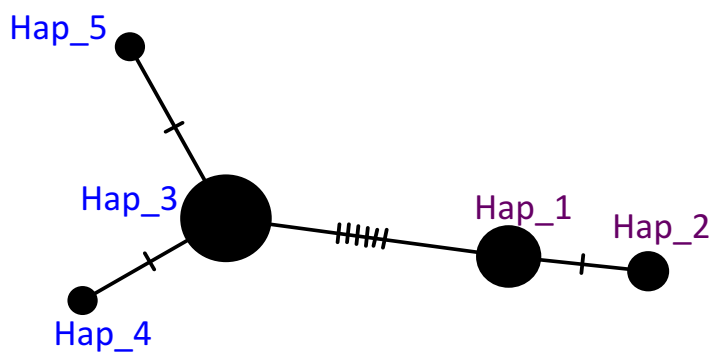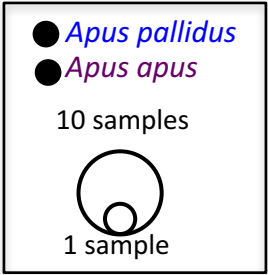

Control region

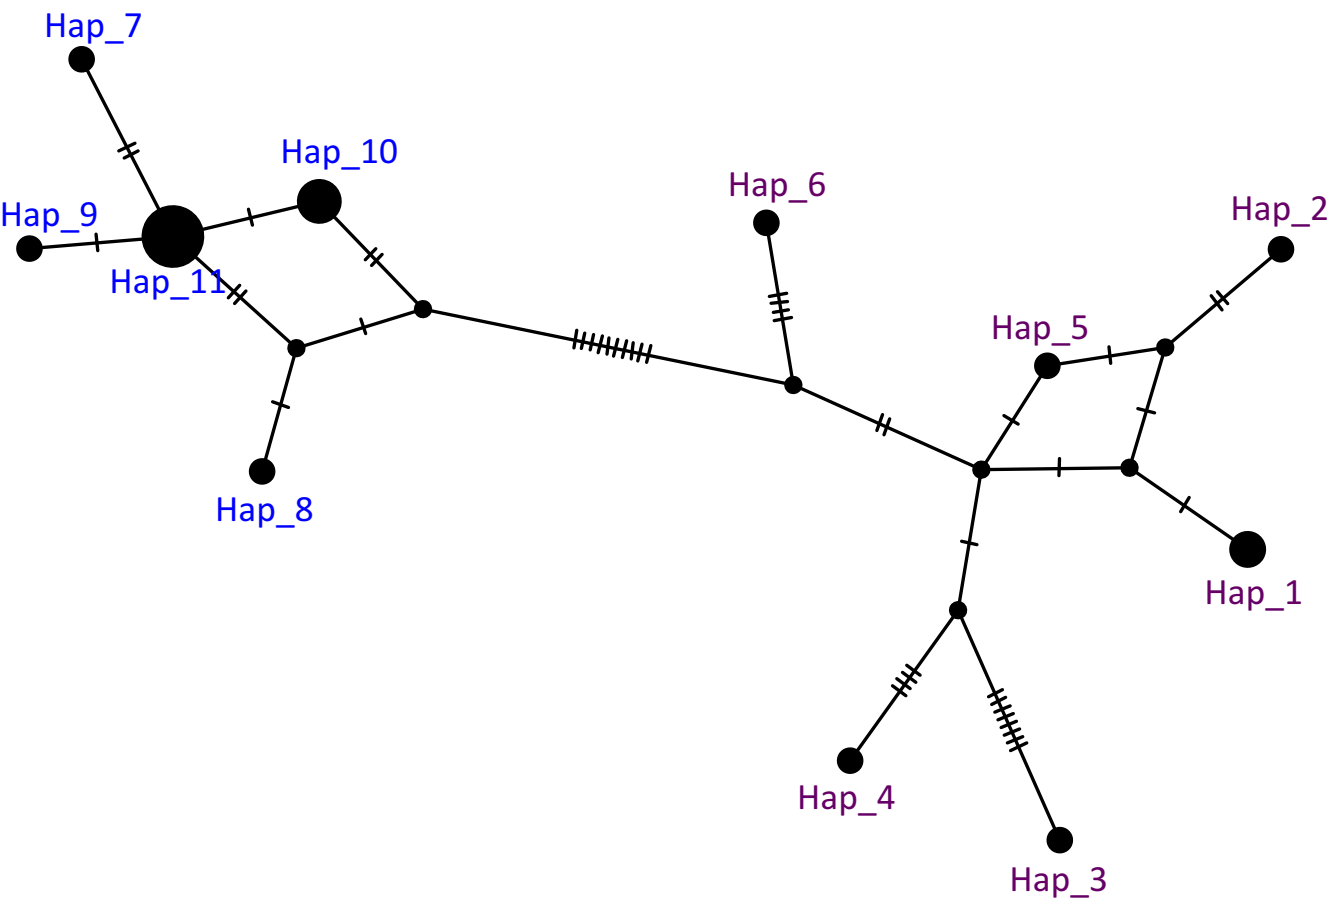

ND2

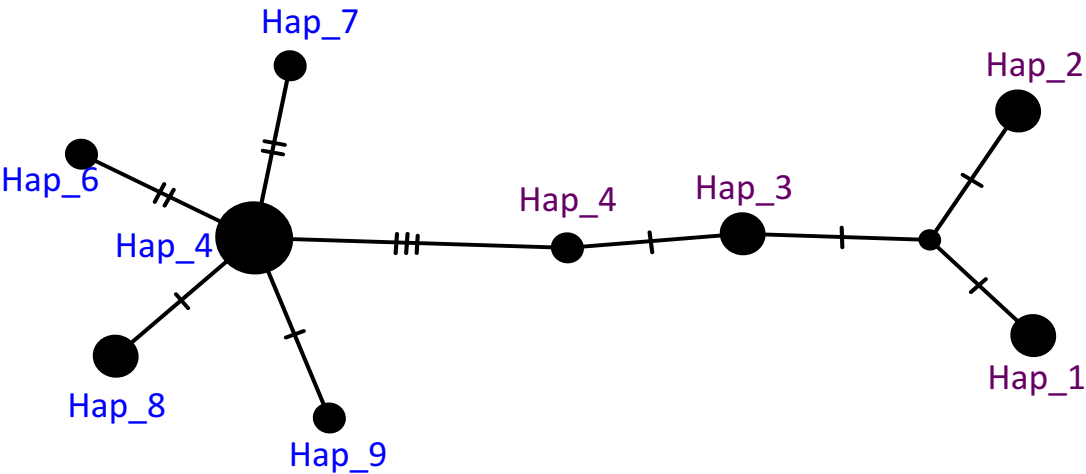

Supplement: Supplementary file 1 [file 1]

(a)

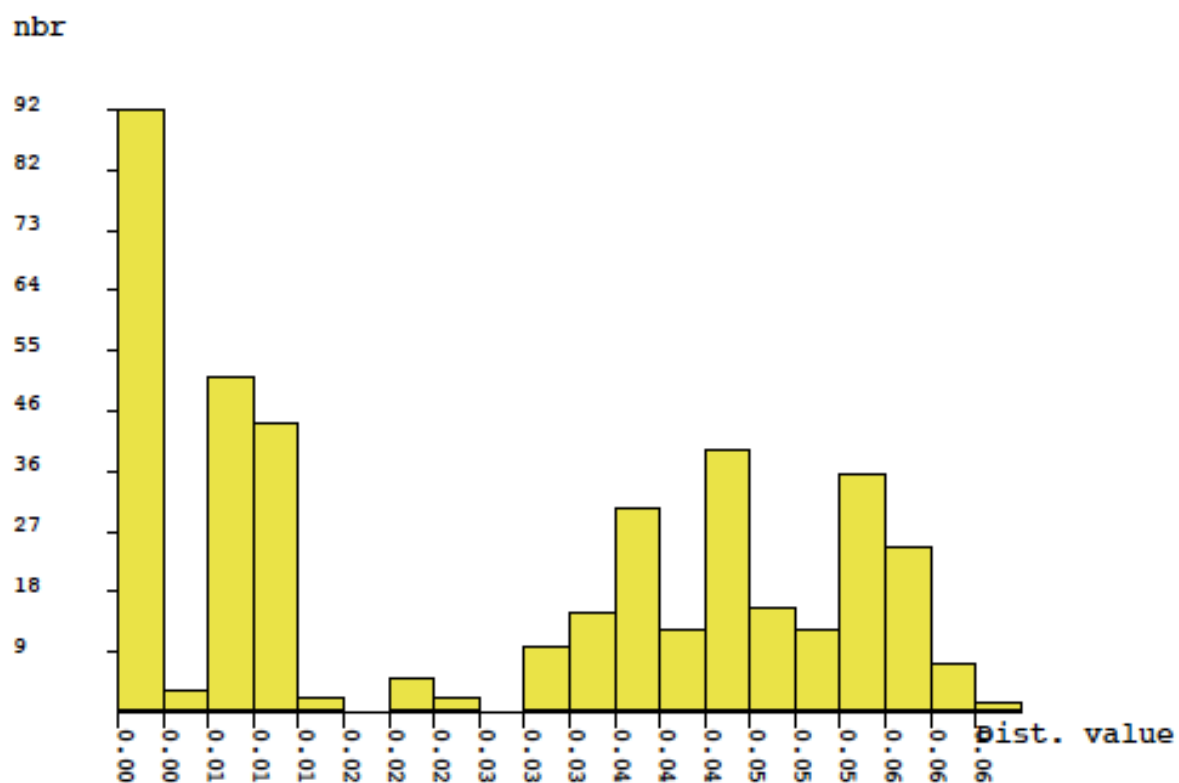

(b)

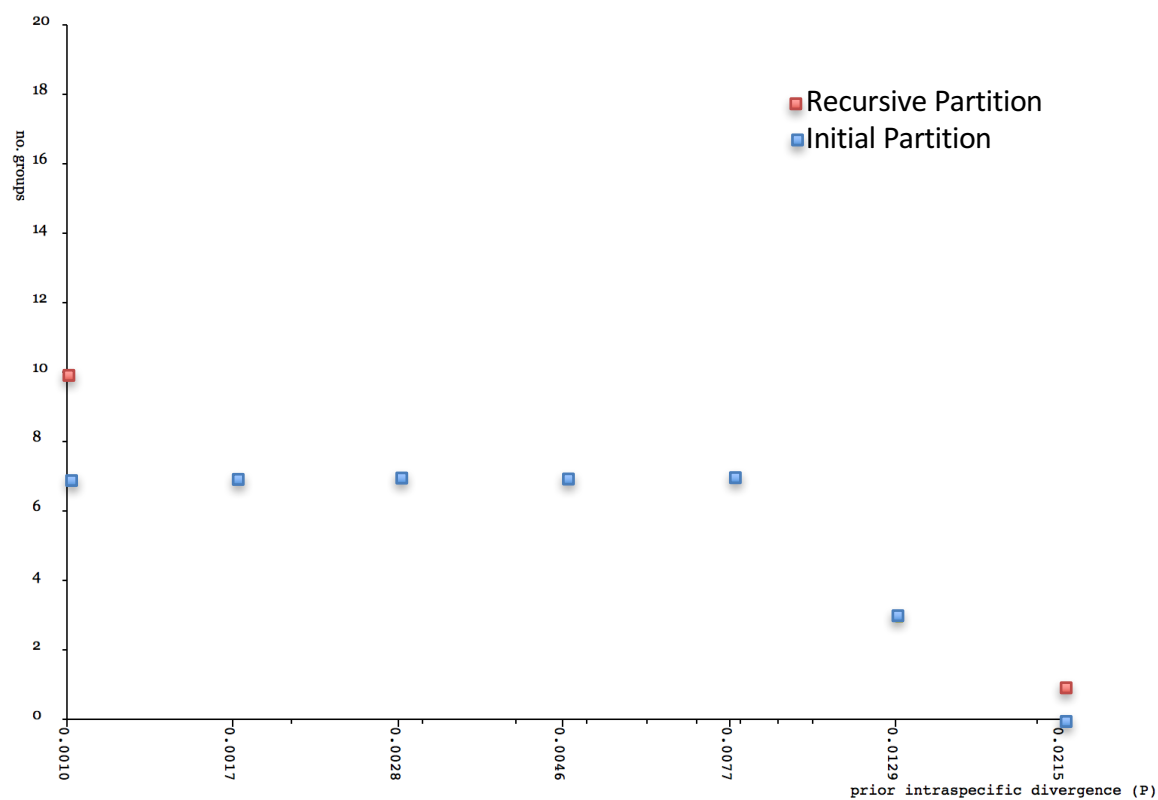

(c)

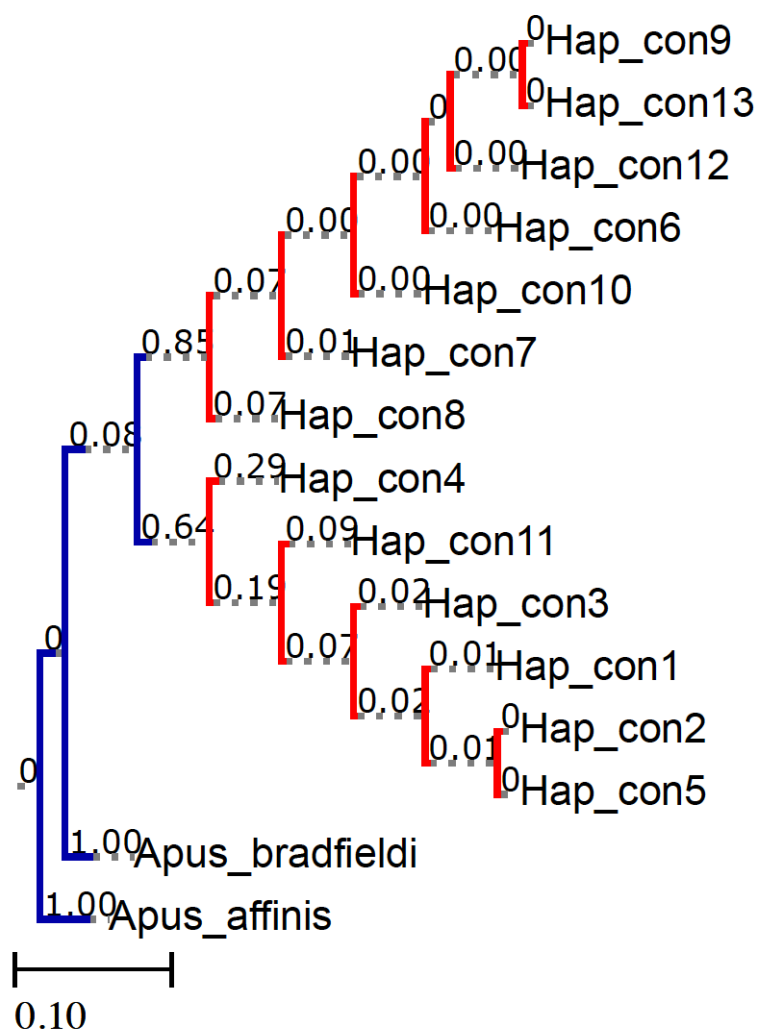

Supplement: Supplementary file 3 [file 1]

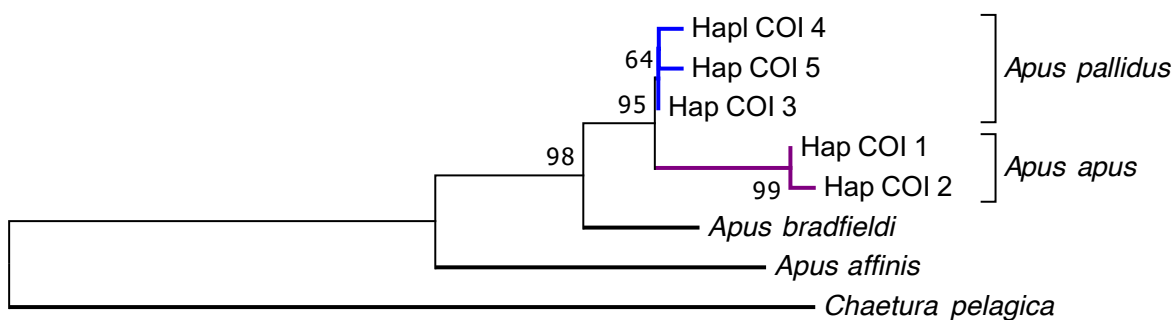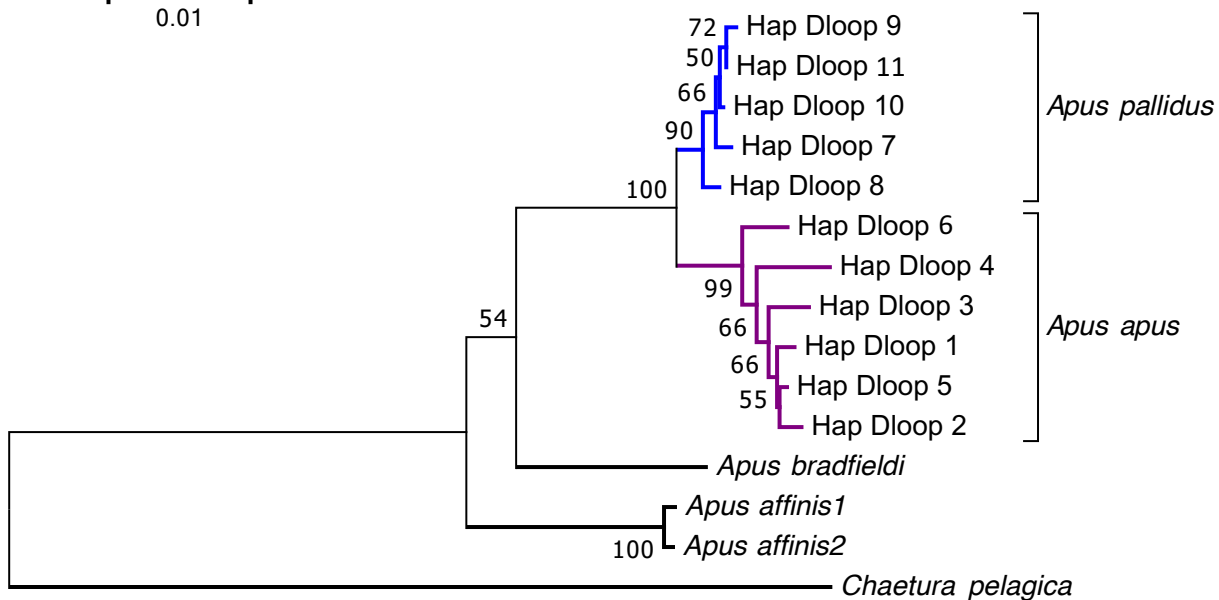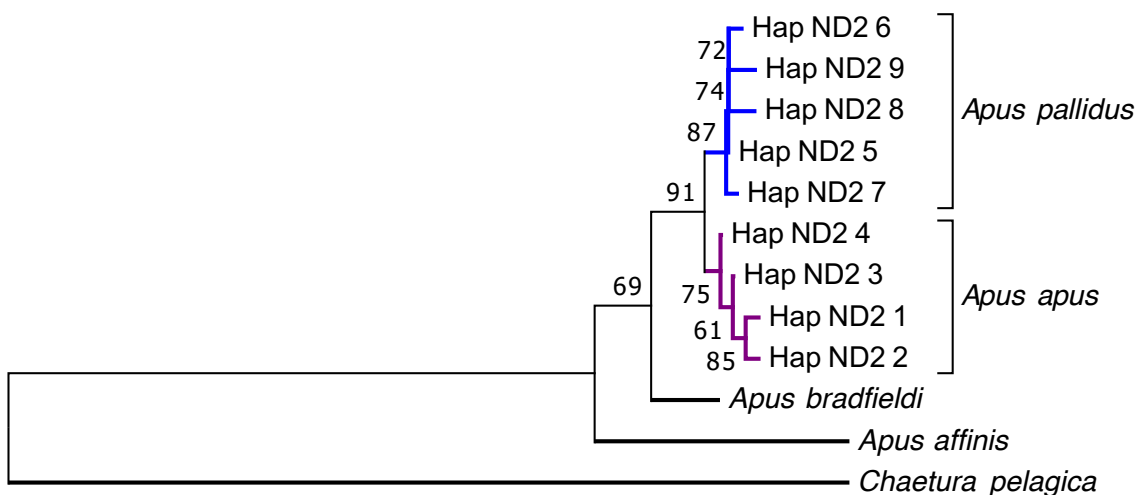

Supplement: Supplementary file 4 [file 2]
